# Supplementary material for: Automatic CT-based finite element model generation for temperature-based death time estimation: feasibility study and sensitivity analysis
Source: Springer Nature journal article supplement (doi:10.1007/s00414-016-1523-0), 2017-01-14
Supplement: MOESM2 [file 11999422]

**Table 1:** Phantom P: Variability of material parameters ρ, c, κ, ε, for beeswax. Different source values depending on: Literature source [Lit]. Temperature measurement laboratory (Lab): TU Freiberg (TUFB), FH Schmalkalden (FHSM), University Erlangen-Nuremberg (FAU), Institute of Forensic Medicine (IFM). Temperature measurement methods: Differential Scanning Calorimetry DSC, Steady State Calorimetry SSC, Hot Disk Measurement HDM.

| Source | ρ [g / cm3] | c [J / (kg °K)] | κ [W / (m °K)] | ε |
| --- | --- | --- | --- | --- |
| Lit | 0.96 [[40](#_ENREF_40)]  0.95 - 0.97 [[41](#_ENREF_41)] | 2099 (17°C) [[42](#_ENREF_42)]  3400 [[43](#_ENREF_43)] | 0.2408 [[20](#_ENREF_20)]  0.26 [[44](#_ENREF_44)]  0.2798 (25°C)  0.2977 (40°C) [[24](#_ENREF_24)]  0.35 [[40](#_ENREF_40)]  0.4 [[45](#_ENREF_45)] | [[25](#_ENREF_25)] |
| Lab | 0.9 (IFM) | DSC warming:  2310 (25°C) - 3100 (40°C)  DSC cooling:  3140 (25°C) - 4920 (40°C)  (FHSM)  SSC:  2530 (25°C) - 3910 (40°C)  (TUFB) | HDM:  0.31 (23°C) (FAU) | 0.88  (FHSM) |
